# Supplementary material for: Broadly neutralizing antibodies isolated from HEV convalescents confer protective effects in human liver-chimeric mice
Source: Springer Nature journal article supplement (doi:10.1038/s41467-025-57182-1), 2025-02-26

## Supplementary Information

### **Broadly neutralizing antibodies isolated from HEV convalescents confer protective effects in human liver-chimeric mice**

George Ssebyatika<sup>#1</sup>, Katja Dinkelborg<sup>#2,3,4</sup>, Luisa J. Ströh<sup>5</sup>, Florian Hinte<sup>6</sup>, Laura Corneillie<sup>7</sup>, Lucas Hueffner<sup>2</sup>, Elina M. Guzman<sup>1</sup>, Prossie L. Nankya<sup>1</sup>, Nina Plückebaum<sup>5</sup>, Lukas Fehlau<sup>2</sup>, Jonathan Garn<sup>2</sup>, Nele Meyer<sup>2</sup>, Sarah Prallet<sup>8</sup>, Ann-Kathrin Mehnert<sup>8</sup>, Anke R. M. Kraft<sup>3,4,9</sup>, Lieven Verhoye<sup>7</sup>, Carina Jacobsen<sup>5</sup>, Eike Steinmann<sup>10</sup>, Heiner Wedemeyer<sup>3,4,11</sup>, Abel Viejo-Borbolla<sup>5,11</sup>, Viet Loan Dao Thi<sup>4,8</sup>, Thomas Pietschmann<sup>2,4,11</sup>, Marc Lütgehetmann<sup>4,12</sup>, Philip Meuleman<sup>7</sup>, Maura Dandri<sup>4,6</sup>, Thomas Krey<sup>1,4,5,11,13 \*</sup>, and Patrick Behrendt<sup>2,3,4\*</sup>

<sup>1</sup>Center of Structural and Cell Biology in Medicine, Institute of Biochemistry, University of Luebeck, Luebeck, Germany

<sup>2</sup>TWINCORE, Centre for Experimental and Clinical Infection Research, a joint venture between Helmholtz-Centre for Infection Research and Hannover Medical School, Hannover, Germany.

<sup>3</sup>Department of Gastroenterology, Hepatology, Infectious diseases and Endocrinology, Hannover Medical School, Hannover, Germany

<sup>4</sup>German Center for Infection Research (DZIF), Braunschweig, Germany

<sup>5</sup>Institute of Virology, Hannover Medical School, Hannover, Germany

<sup>6</sup>Department of Internal Medicine, University Medical Center Hamburg-Eppendorf, Hamburg, Germany.

<sup>7</sup>Laboratory of Liver Infectious Diseases, Department of Diagnostic Sciences, Faculty of Medicine and Health Sciences, Ghent University, Ghent, Belgium

<sup>8</sup>Schaller Research Group, Department of Infectious Diseases, Virology, University Hospital Heidelberg, Center for Integrative Infectious Diseases Research (CIID), 61920 Heidelberg, Germany.

<sup>9</sup>Centre for Individualised Infection Medicine (CiiM), a joint venture between Helmholtz-Centre for Infection Research and Hannover Medical School, Hannover, Germany

<sup>10</sup>Department of Molecular and Medical Virology, Ruhr University Bochum, Bochum, Germany

<sup>11</sup>Cluster of Excellence RESIST (EXC 2155), Hannover Medical School, Hannover, Germany

<sup>12</sup>University Medical Center Hamburg-Eppendorf, Institute of Medical Microbiology, Virology and Hygiene, Hamburg, Germany

<sup>13</sup>Centre for Structural Systems Biology (CSSB), Hamburg, Germany

## **Table of Contents:**

**Figure S1: Characterization of recombinant HEV P domains used in this study**

**Figure S2: FACS plots showing the gating strategy for the sorting of single HEV-specific memory B cells**

**Figure S3: Neutralization of HEV by single chain variable fragments (scFvs)**

**Figure S4: Kinetic binding analysis of bnAbs with pORF2 P-domain**

**Figure S5: Broad nAb reactivity with GT 3 strain 83-2**

**Figure S6: Immunofluorescence analysis using human  $\alpha$ -pORF2 IgGs**

**Figure S7: Epitopes targeted by glycan-sensitive human bnAbs**

**Figure S8: Electron density maps for HEV bnAbs in complex with P domain**

**Figure S9: Semiquantitative analysis of glycan-sensitive Abs in patient sera**

**Figure S10: nAb p60.1 prevents fecal-oral HEV infection in human liver-chimeric mice**

**Figure S11: Amino acid alignment of P domain sequences showing conservation and residues involved in interaction with bnAbs p60.1 and p60.12**

**Table S1: Sequence information of HEV pORF2 P-domain-specific antibodies**

**Table S2: Kinetic interaction analysis between bnAbs and glycosylated and non-glycosylated GT 3 P domains**

**Table S3: Characteristics of patient samples used for ELISA and isolate neutralization in HLCs**

**Table S4: Kinetic interaction analysis between bnAbs and non-glycosylated GT 3 P domains of different strains**

**Table S5: Diffraction data collection and refinement statistics**

**Table S6: Accession numbers of virus strains and isolates used in this study**

**Table S7: HEV antigen detection by different ELISAs**

**Table S8: List of oligonucleotides used in this study**

**Source Data for Figure S1**

**Figure S1: Recombinant HEV P domains used in this study**

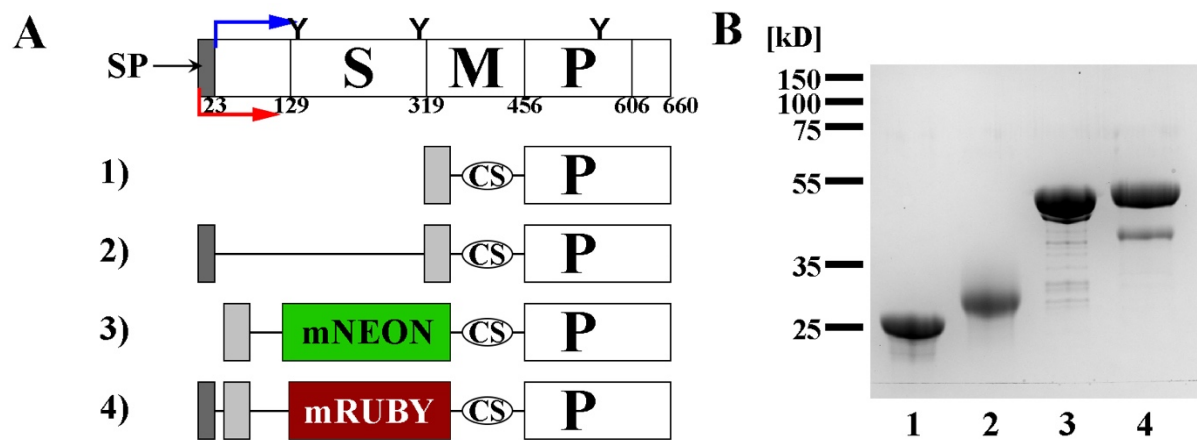

Figure S1: A) Schematic primary structure of ORF2, its individual domains (S/M/P), and the different expression constructs for the recombinant GT 3 P domains used in this study. Red and blue arrows indicate the described start codons for the glycosylated and non-glycosylated ORF2 in the presence and absence of a signal peptide, respectively. Numbers indicate amino acid positions within the GT 3 ORF2. SP, signal peptide (dark grey box); DST, double strep tag (light grey box); CS, proteolytic cleavage site for removal of affinity tag and fluorophore. Possible N-linked glycosylation sites are indicated. B) SDS-PAGE analysis followed by Coomassie staining reveals a slower migration of the glycosylated P domain (lanes 2 and 4) compared to the non-glycosylated P domain (lanes 1 and 3), likely caused by the attached glycan at position 562. Lanes 1-4 correspond to constructs 1) - 4) in panel A. Source data are provided within the Source Data file.

**Figure S2: FACS plots showing the gating strategy for the sorting of single HEV-specific memory B cells**

A

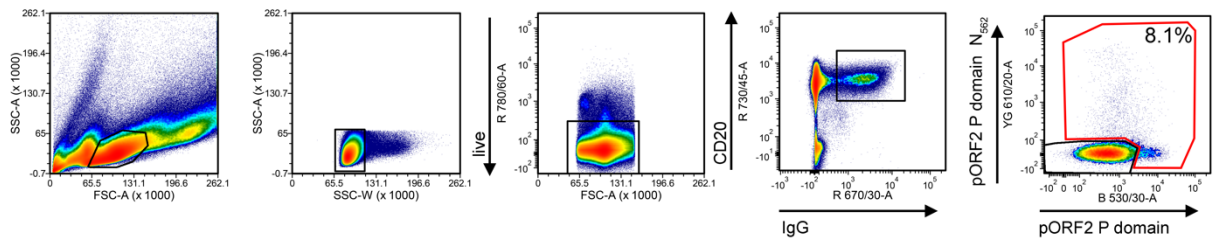

B

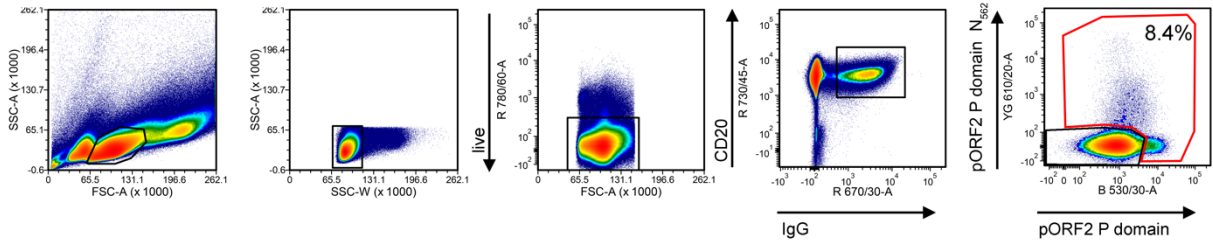

Figure S2: Representative FACS plots showing the gating strategy for sorting single pORF2 P-domain-specific memory B cells. (A) patient p60 and (B) patient p61. The red gate highlights the sorted cells.

**Figure S3: Neutralization of HEV by single chain variable fragments (scFvs)**

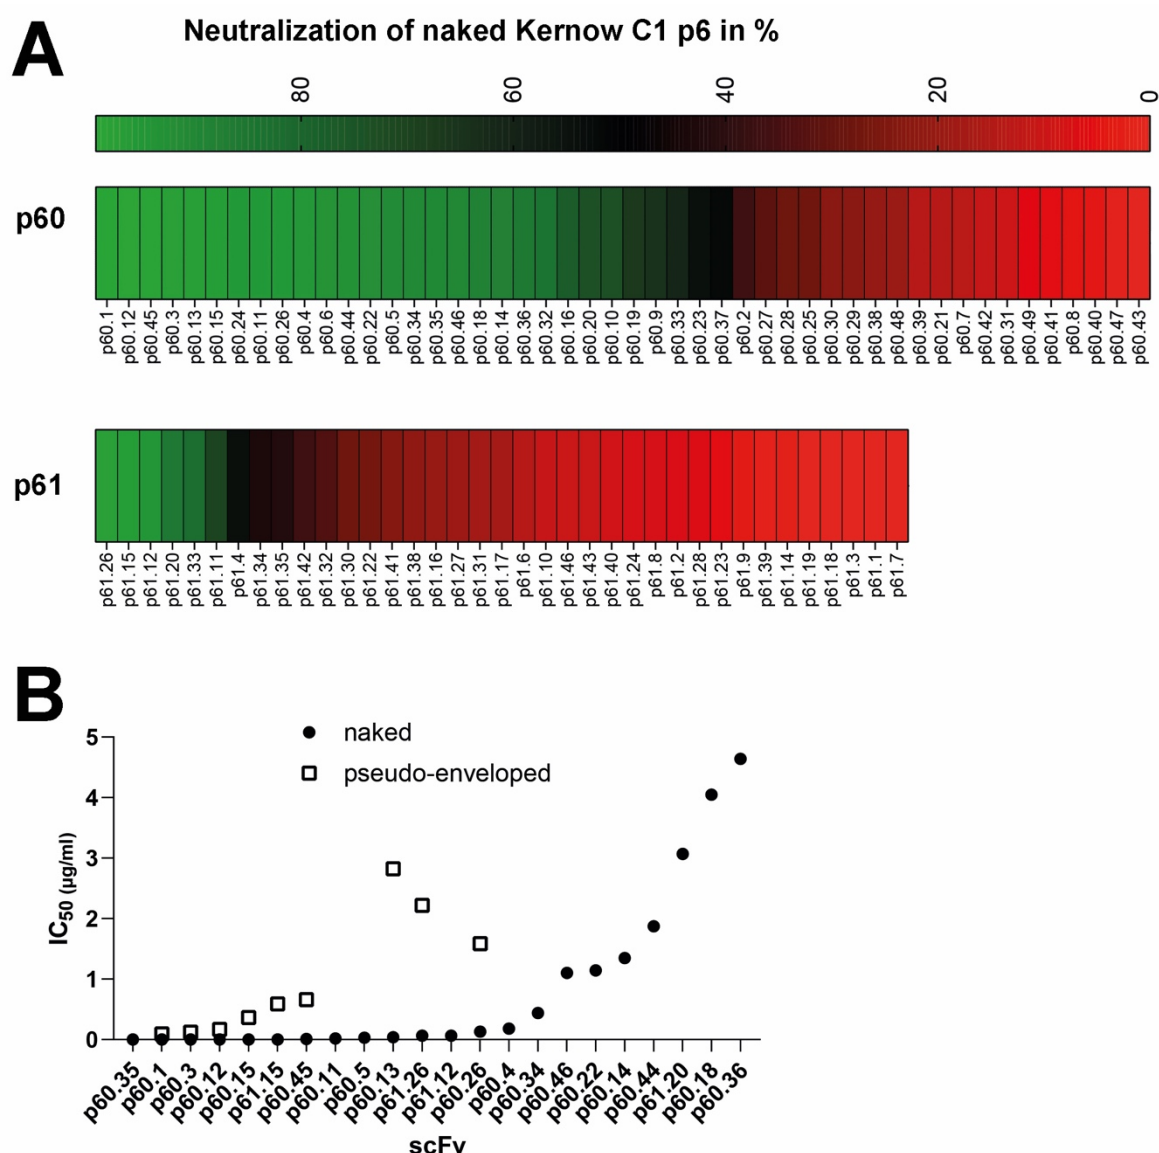

Figure S3: (A) 85 scFv expressed from patients 60 (p60) and 61 (p61) ranked according to their neutralizing capacity at a concentration of 10 µg/ml, with samples colored green showing at least 50% neutralization. Values are normalized to the control in the absence of scFv (n= 2 biological replicates) (B) The best neutralizers from (A) were further tested in serial dilution at concentrations of 5, 0.5, 0.05, and 0.005 µg/ml against naked HEV (dots) and at concentrations of 10, 5, 0.5, and 0.05 µg/ml against pseudo-enveloped HEV (boxes) to calculate the IC<sub>50</sub> using GraphPad Prism 9. Samples are ranked for the IC<sub>50</sub> against naked HEV. Neutralization of pseudo-enveloped HEV was not observed for all tested scFvs. Source data are provided within the Source Data file.

**Figure S4: Kinetic binding analysis of bnAbs with pORF2 P-domain**

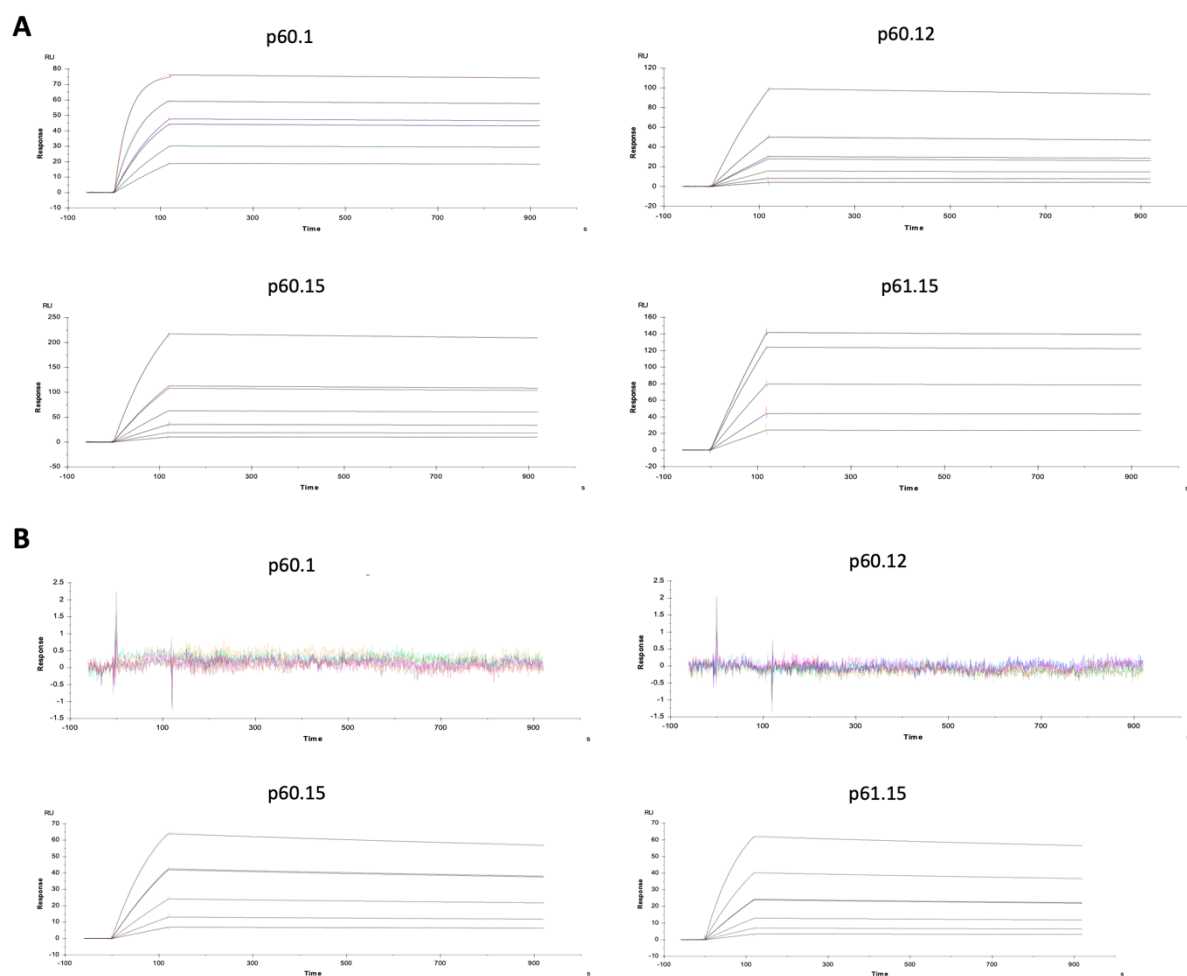

Figure S4: SPR analysis of nAbs p60.1, p60.12, p60.15, and p61.15 at 25, 12.5, 6.25, 3.125, and 1.5625 nM to the immobilized non-glycosylated (A) or glycosylated (B) HEV GT 3 P domain. The colored lines represent a 1:1 kinetic model fit. The kinetic binding parameters are shown in Table S2.

Figure S5: Broad nAb reactivity with GT 3 strain 83-2

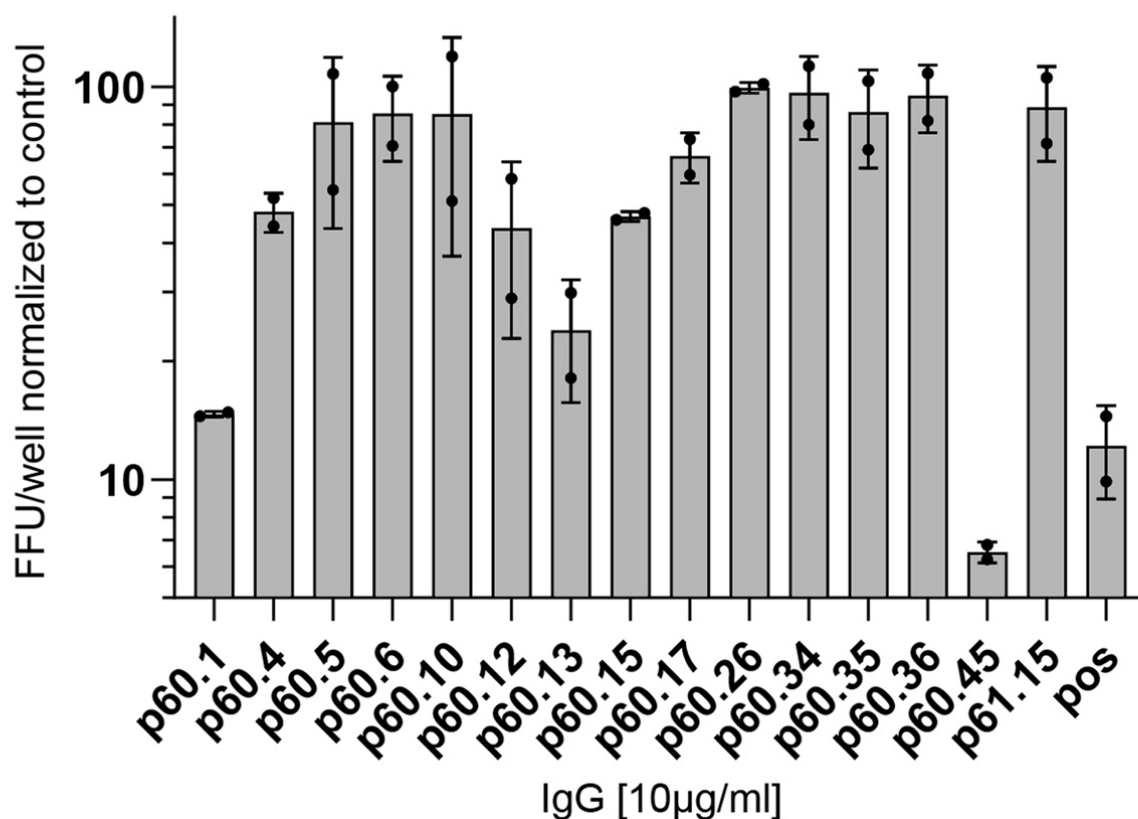

Figure S5: Percent of focus forming units per well of HepG2/C3A cells infected with HEV pUC83-2-27 neutralized with the indicated antibodies at a concentration of 10 µg/ml. The values are normalized to the control, to which no antibody was added. A human anti-HEV positive serum was used as positive control (pos) (n= 2 biological replicates). Source data are provided within the Source Data file.



**Figure S6: Immunofluorescence analysis using human  $\alpha$ -pORF2 IgGs**

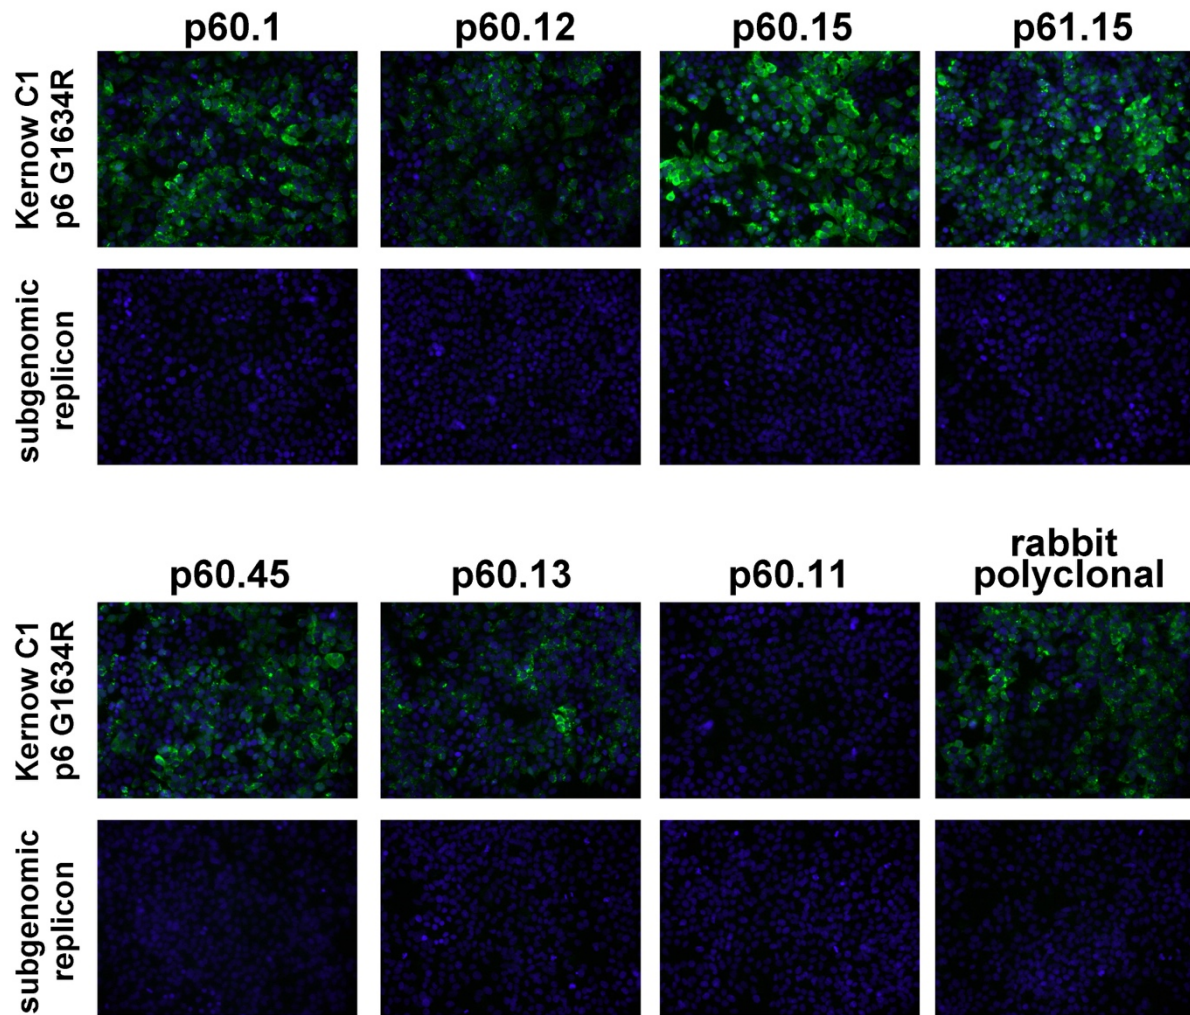

Figure S6: Immunofluorescence images depict HepG2 cells transfected with the viral genome (Kernow C1 p6 G1634R) or a subgenomic replicon lacking ORF-2 as control (subgenomic replicon). Four days after transfection, cells were washed and fixed using 3% PFA and permeabilized with Triton X-100 prior to staining with 0.25  $\mu$ g/ml of the indicated primary antibodies. As control, a rabbit polyclonal anti-P domain antibody was used. Bound nAbs were detected using fluorescently labelled anti-human or anti-rabbit secondary antibodies. Images were taken at 20x magnification, and nuclei stained with DAPI. The experiments were repeated three times with similar results.

**Figure S7: Glycan-sensitive antibodies bind to a conserved epitope at the tip of the P domain dimer**

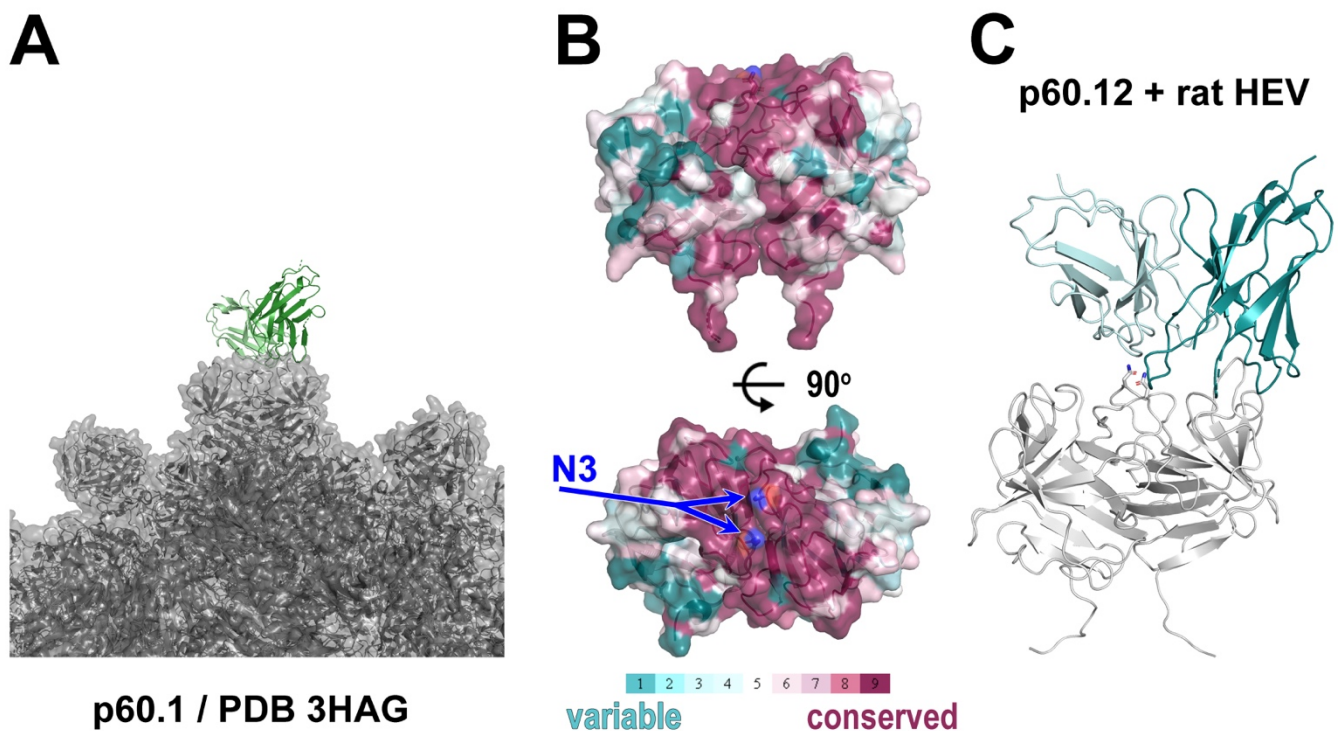

Figure S7: A) Superposition of the crystal structure of the P domain in complex with bnAb p60.1 to the crystal structure of HEV virus-like particles (PDB 3HAG). The VLP is shown as surface representation in grey, while p60.1 is shown as a green-coloured cartoon. B) Amino acid conservation of different HEV genotypes used in this study (Table S4) mapped onto the P domain crystal structure. Sidechain oxygen and nitrogen atoms of N562 are colored in red and blue, respectively, and a blue arrow indicates the position of N3. Amino acid sequence alignments were performed using Clustal Omega (EBI), and the conservation was mapped using the ConSurfDB server (<https://consurfdb.tau.ac.il/>). C) Cartoon view of the complex crystal structure of the rat HEV P domain (grey) and bnAb p60.12 (cyan). Sidechain oxygen and nitrogen atoms of N<sub>562</sub> are colored in red and blue, respectively, to indicate the position of N3.

**Figure S8: Electron density maps for HEV bnAbs in complex with P domain**

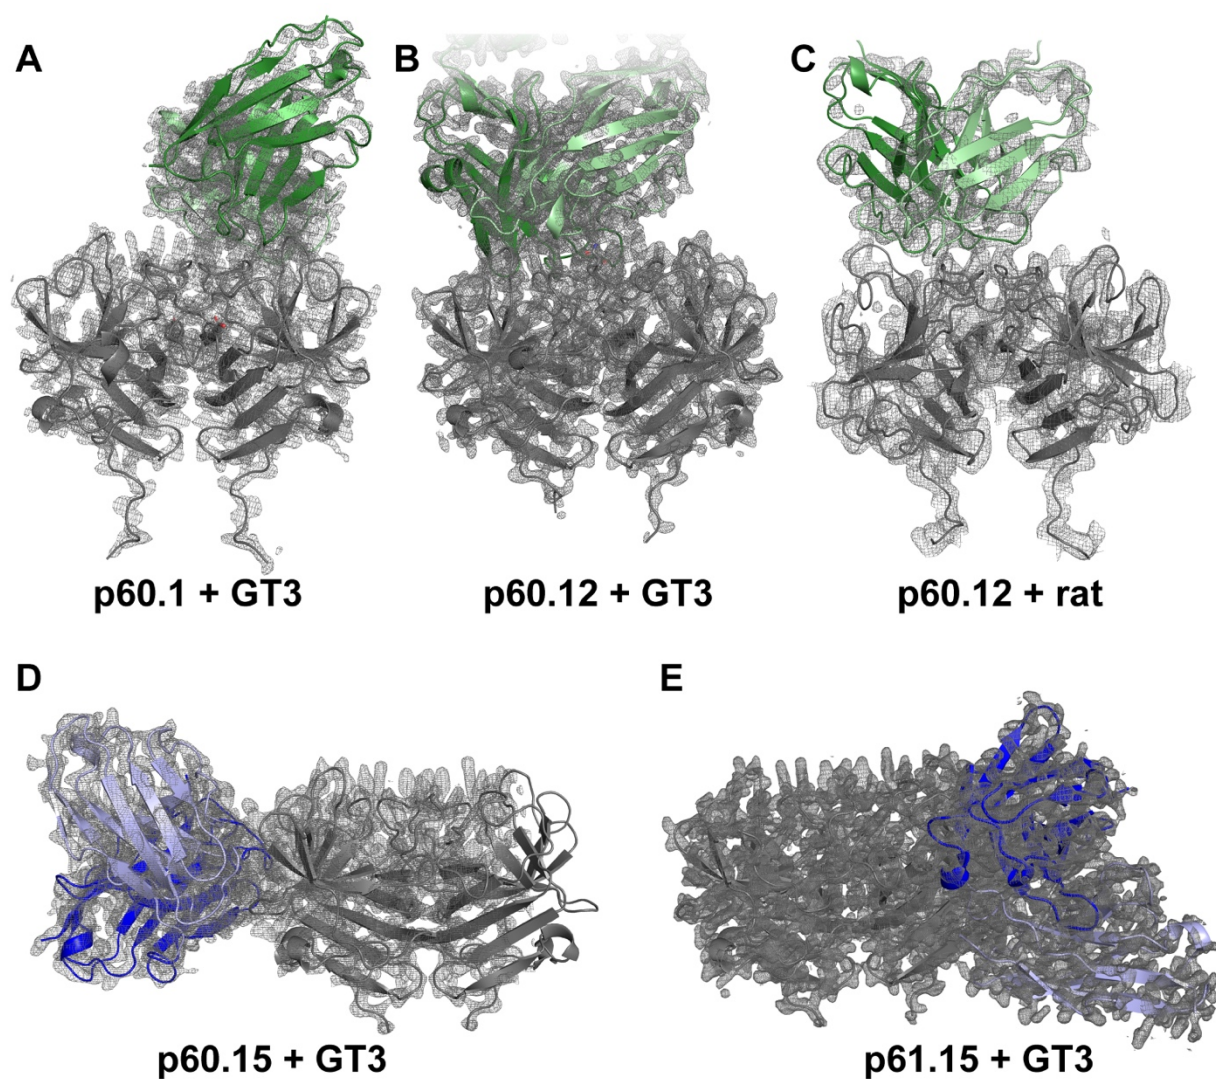

Figure S8: 2Fo-Fc electron density maps contoured at  $1.5 \sigma$  are superimposed on the corresponding refined atomic models shown as cartoon. For clarity, one P domain dimer is shown in each case. A GT 3 strain P domain was crystallized in complex with (A) p60.1, (B) p60.12, (D) p60.15, and (E) p61.15. (C) A rat HEV P domain was crystallized in complex with p60.12.



**Figure S9: Glycan-sensitive Abs are induced during acute HEV infection**

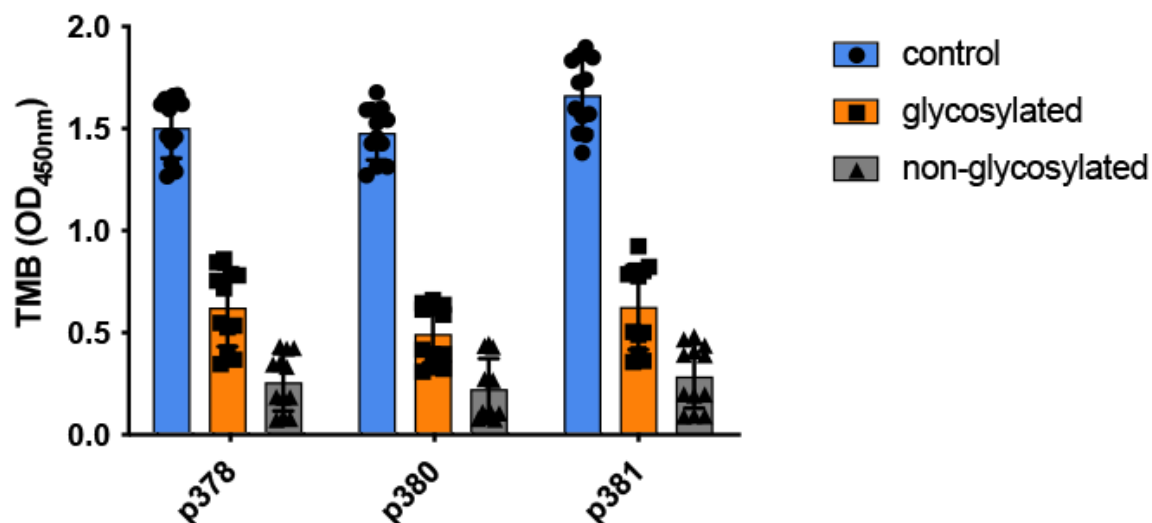

Figure S9: Sera from three patients, who underwent an acute HEV infection (p378, p380, and p381) were depleted in parallel with either glycosylated (orange), non-glycosylated (grey) or no (control, blue) GT3 P domain and subsequently subjected to a direct ELISA against the non-glycosylated P domain. The signal difference between the two differentially depleted serum samples is likely caused by steric interference of the glycan chain attached to N<sub>562</sub> with antibodies recognizing a juxtaposed epitope. The chart shows the mean of four independent biological replicates, error bars indicate the standard deviation. Source data are provided within the Source Data file.

**Figure S10: nAb p60.1 prevents fecal-oral HEV infection in human liver-chimeric mice**

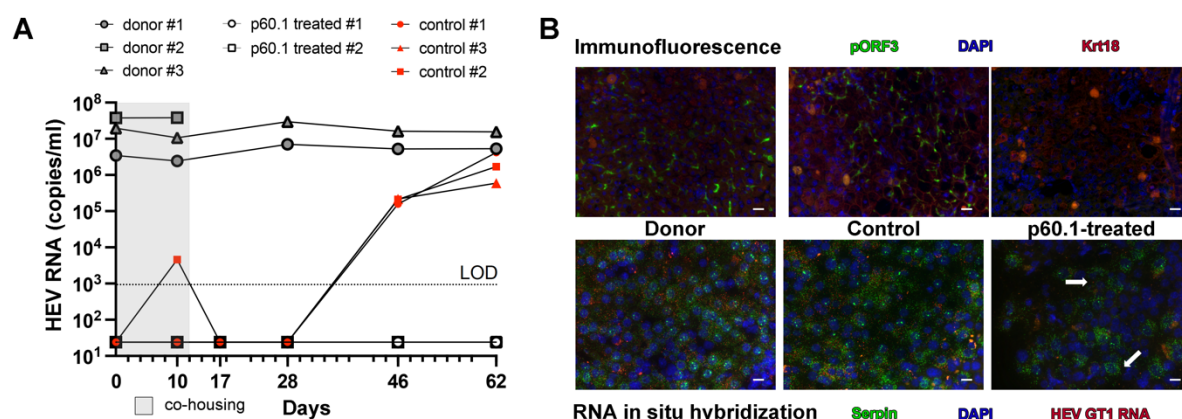

Figure S10: (A) Viral titers in the serum (copies/ml) of three donor mice (grey symbols), two antibody-treated mice (red symbols), and three control antibody-treated mice (empty symbols) were monitored over 62 days. At specific time points, blood was taken retrobulbar, viral RNA was isolated and measured by quantitative RT-PCR. LOD = 1000 copies/ml, light grey box = co-housing phase. Source data are provided within the Source Data file. (B) Visualization of HEV GT1 ORF3 protein (pORF3) in the liver of infected mice. Representative immunofluorescent staining of pORF3 (green) in liver sections from donor mice, control antibody-treated mice, and p60.1-treated mice. Human hepatocytes are stained with anti-Krt18 antibodies (red), and nuclei are visualized with DAPI (blue). Scale bars represent 20  $\mu$ m.

[illegible]

Figure S11: Amino acid alignment of the P domain sequences used in this study and the Hecolin® sequence. The secondary structure elements of the P domain are shown below the alignment. Residues involved in interaction with bnAb p60.1 (A) are colored in green, residues interacting with p60.12 (B) in cyan. Dots represent conserved amino acid residues. Amino acids numbered according to HEV genotype 3 (UniProt accession number C4B4T9)

**Table S1: Sequence information of HEV pORF2 P-domain-specific antibodies**

| Ab code | Donor | VH germline gene | CDRH1      | CDRH2       | CDRH3                      | VL germline gene | CDRL1       | CDRL2  | CDRL3           |
|---------|-------|------------------|------------|-------------|----------------------------|------------------|-------------|--------|-----------------|
| p60.1   | p60   | IGHV 6-1         | GDSVSTINAA | TYRSKWYH    | CARDRGPTPFDFW              | IGKV 1-39        | QSIIRS      | AAS    | CQQSFVTPFTF     |
| p60.2   | p60   | IGHV 6-1         | GDSVSTINAA | TYRSKWYH    | CARDRGPTPFDFW              | IGLV3-21         | NIGSKS      | DDS    | CQVWSSSDQGVF    |
| p60.3   | p60   | IGHV 6-1         | DVSNINVA   | TYRDKWYT    | CASHGSDPYAFDIW             | IGLV 1-40        | RSNIGTRY    | GNI    | CQSYDLSLGVVF    |
| p60.4   | p60   | IGHV 1-2         | GYTFTGIS   | INPKTGGT    | CARLDLLWSGELTGPKIYYYYGMDVW | IGKV 1D-39       | QISINY      | AAS    | CQQSDSTPFTF     |
| p60.5   | p60   | IGHV 3-21        | GFTFSYSY   | ISSSSSYI    | CARGGGLMITFGVGMGMDVW       | IGKV 2-28        | QSLHNSNGYNY | LGS    | CMQALQTPYTF     |
| p60.6   | p60   | IGHV 3-23        | GFTFSYIT   | MSGSGDNT    | CATRRLYCTTSCVMYFDDW        | IGLV 2-8         | STDVGGYNY   | DVN    | CSSYAASDTLLF    |
| p60.7   | p60   | IGHV3-30         | GFPFSTYG   | ISYDGNK     | CAKDDYASGPFDFYW            | IGKV1-9          | QGISY       | AAS    | CQQLNTYPTF      |
| p60.8   | p60   | IGHV4-30-2       | GSSIRSGDYI | IYSGTT      | CARAGRKTIVTPDLDYW          | IGLV1-44         | WTNIGDNY    | KHS    | CASWDDSLRGWVF   |
| p60.9   | p60   | IGHV5-51         | GYSTYSYW   | IYPGDSIT    | CARSRDRGVGFDPW             | IGKV3-20         | QSVSSTY     | GAS    | CQHYGSSPHTF     |
| p60.10  | p60   | IGHV 6-1         | GDSVSSNSAA | TYRSKWYN    | CASGSYQHFDFW               | IGLV 2-23        | SSDVGSYNL   | EVS    | CCSYAGSSYYVF    |
| p60.11  | p60   | IGHV 1-46        | GYTFTSYI   | INPSAGHT    | CARAAARRREILDYW            | IGLV 3-21        | NIGSR5      | DGS    | CQMWDTSSDRGVF   |
| p60.12  | p60   | IGHV 1-69        | GDTFTSYV   | IPIIGTA     | CASNVLQRRGNWFDPW           | IGLV 2-14        | SSDIGDYNF   | DVT    | CCSYTNTNTPVVF   |
| p60.13  | p60   | IGHV 3-48        | GF5FRSYE   | ITSGSGGT    | CATVIRRDGYN5DW             | IGLV 1-40        | TSNIGAPYD   | GNT    | CQSYDNL5G5VF    |
| p60.14  | p60   | IGHV 4-4         | GG5ISSNNW  | IHH5GSI     | CAREAIYNGMDVW              | IGKV 3-20        | QRISSY      | GAS    | CQQYASSPKTF     |
| p60.15  | p60   | IGHV 5-51        | GDTFANYW   | IYPRDSOI    | CARHLRLRLGLFPFDYW          | IGKV 1-9         | QDIFSY      | AAS    | CQQLNRYPPAF     |
| p60.16  | p60   | IGHV1-18         | GYSTYSYG   | ISGNGNPN    | CARHLDYDSSGYPWPYDFW        | IGLV3-21         | SIGGKN      | DDS    | CQVWDTDTDHVIF   |
| p60.18  | p60   | IGHV 1-18        | GFPTNYG    | ITPYNRNT    | CASLKRHGYNLPYFDYW          | IGKV 1-12        | QGVNSW      | AAS    | CQQANSPYTF      |
| p60.19  | p60   | IGHV 1-18        | GYTFTSYG   | ISVHNGNI    | CARDGGWNSRLFDYW            | IGLV1-44         | NSNVGTIA    | SNN    | CATWNSDLNDWVF   |
| p60.20  | p60   | IGHV1-18         | GYTFTSYG   | ISAYNGNT    | CARDRGSFISGSVGADEFDNDW     | IGKV2-30         | QGLVYIDGNTY | KVS    | CMQGTWHPYTF     |
| p60.21  | p60   | IGHV 1-18        | GYTFTSYG   | ISGYNNGT    | CAREGSSGWHRLIDYW           | IGLV1-44         | SSNIGTKT    | TNN    | CAAWDDSLNGWVF   |
| p60.22  | p60   | IGHV 1-18        | GYTFATYD   | ISTYSGNT    | CARDDKWRSITPSYSHGYAPLDYW   | IGKV 1-5         | QSISSW      | KAS    | CQSYSSPTVF      |
| p60.23  | p60   | IGHV1-18         | GYTFTAYG   | INGYNGNT    | CARVGTDTSGYVWLW            | IGKV1-8          | QDIGSF      | AAS    | CQQYD5VPRTF     |
| p60.24  | p60   | IGHV 1-18        | GYTFSSYA   | ISAYNGNT    | CARVYYYGWGDFDPW            | IGKV 3-20        | QSVSSSY     | GAS    | CQQYSSSPYTF     |
| p60.25  | p60   | IGHV 1-18        | GYTFSSYG   | ISAYNGDS    | CARDRHSYDRLGHYHYAMDVW      | IGLV3-19         | SLRSY       | GEN    | CNSRDS5GNGLLGIF |
| p60.26  | p60   | IGHV 1-18        | GYNFTTYS   | ISNYNGKA    | CARDPIYDSGSYIAHFQYIGDYW    | IGLV 3-25        | ALPKQY      | KDS    | CQ5ADSSSGWVF    |
| p60.27  | p60   | IGHV 1-18        | GYFTFSYG   | ISTYNGNT    | CARDVKPRSGHRAHYHMEVW       | IGLV2-8          | SSDVGGYNY   | EVS    | CCSY5NNNLVF     |
| p60.28  | p60   | IGHV 1-18        | GYTFSSYG   | ITPYNGNT    | CAGSVEVERDYNGMDVW          | IGKV1D-39        | QISITY      | AAS    | CQQSYSTPPFTF    |
| p60.29  | p60   | IGHV1-18         | GYNFHNYG   | INTFTGNR    | CARDVRCSGDCSDSYHFYGMDDW    | IGKV3D-15        | QSISSN      | GAS    | CQQYNNWPPWTF    |
| p60.30  | p60   | IGHV1-18         | GYTFTSYG   | IRAVTGENVY  | CARDQKEIVVPAEYGMDDW        | IGLV1-51         | SSNIGNHF    | DNN    | CGTWDDSLRIVVF   |
| p60.31  | p60   | IGHV1-2          | GVRTGTGY   | IDPDSGGT    | CARGQDHVSVDVSLGDHW         | IGLV1-51         | STNIGDNY    | ENN    | CGTWDRSLSAWVF   |
| p60.32  | p60   | IGHV1-2          | GYSTFTGY   | INPNSGGT    | CAGGCVTTISDYW              | IGLV2-11         | SSDVGGYNY   | DVT    | CCSYAG5WVF      |
| p60.33  | p60   | IGHV1-2          | GFTFTGYI   | ISPN5GGT    | CARGRVVVPAILYW             | IGLV6-57         | SGDISSNY    | EDN    | CQSYD5TPWVF     |
| p60.34  | p60   | IGHV 1-2         | GYTFTGY    | INPNSGGT    | CLRGHYVDSGLW               | IGLV 4-69        | SGHSSYA     | LNSDGS | CQTWGTGTGVF     |
| p60.35  | p60   | IGHV 1-2         | GYTFTGYI   | INPNSGVT    | CAKRAPIIPWVDPW             | IGLV 6-57        | SGSIASNY    | EDD    | CQSYDSDTVVF     |
| p60.36  | p60   | IGHV 1-2         | GYNFIGYI   | INPNRGST    | CARDITG5NSNDWFDPW          | IGLV 3-10        | ALPKKF      | EDT    | CYSTDS5GNGGGVF  |
| p60.37  | p60   | IGHV 1-2         | GYTFTAYY   | INPNSGGT    | CARWVVPGLYSMDVW            | IGLV3-21         | NIGSKR      | DES    | CQVWDTDTDPVVF   |
| p60.38  | p60   | IGHV1-2          | GYPNVHYI   | ISPNTGGT    | CAREGRGLTMSRGTGYGMDVW      | IGKV3-11         | QSVSDY      | DAS    | CQQR5NWP1TF     |
| p60.39  | p60   | IGHV1-24         | GYTLTELS   | FDPEDEGR    | CSTASLAPIAWPFDYW           | IGKV1D-39        | QSI5RH      | GAD    | CQQR5NP1WTF     |
| p60.40  | p60   | IGHV1-24         | GHTLPDLF   | FDHEDGER    | CATGIVEDIPGGLDYGLD5W       | IGLV1-44         | SSNVEFNS    | AND    | CSVWDDNLH5VF    |
| p60.41  | p60   | IGHV1-3          | GYMFS5HS   | INTDTGNT    | CARDRYGSGHYNYFDYW          | IGKV3-20         | QADSKY      | GIS    | CQQYSS5PWT      |
| p60.42  | p60   | IGHV1-3          | GYTETTYS   | INAGNGNT    | CAREMPRIVGATGWFDPW         | IGLV3-19         | SLRSY       | GKN    | CCSRD55NHPVLF   |
| p60.43  | p60   | IGHV1-3          | GYNLTDYA   | VNGDNGDT    | CAREGGDCTGTCYSGYMDVW       | IGLV3-25         | ALPKQY      | KDS    | CQSPD5SATYVF    |
| p60.44  | p60   | IGHV 1-3         | GY5FTNYA   | INAGNGDT    | CARVYSTSKTPRRDYSYGMDDW     | IGLV 1-40        | SSNIGAGYD   | GNN    | CQSFDD5SL5G5VF  |
| p60.45  | p60   | IGHV 1-46        | GYTFTSYF   | INPSAGST    | CARDLKTSGWQRQFDSW          | IGLV 3-21        | NIGGER      | DDS    | CQVWSSSDQGVF    |
| p60.46  | p60   | IGHV 1-46        | GYTFTNYI   | INPSGGST    | CARDQAGSGYFDW              | IGKV 1-5         | QSISSW      | KAS    | CQQFNSYPPWTF    |
| p60.47  | p60   | IGHV1-46         | GYTFASYY   | ISPGDNST    | CAR5PPPSEISYHLHFDYW        | IGLV1-40         | SNIGAGYH    | DND    | CQSYD5SL5G5VF   |
| p60.48  | p60   | IGHV1-46         | GYTFTSYI   | INPSGGST    | CARGNIWVPAASNNWFDPW        | IGLV2-14         | SSDIGAYNY   | DVI    | CCSYTTRTLVF     |
| p60.49  | p60   | IGHV1-58         | GPLNLNSA   | IIVGSGYT    | CAADVPITIFGVFS5W           | IGKV3-11         | QNVHSF      | DAS    | CQQR5WP5RAF     |
| p61.1   | p61   | IGHV1-2          | GHTFTGYI   | INPN5GGT    | CARLYRDAFDIW               | IGLV2-8          | SSDVGGYNY   | EVK    | CASYAG55YVF     |
| p61.2   | p61   | IGHV4-59         | GG5FTDYI   | INHKGNT     | CARHFSYSALEFLTVISRMGAFD5W  | IGLV3-19         | SLRKYY      | GKD    | CN5GD5NTYVF     |
| p61.3   | p61   | IGHV2-5          | GFSLRNSGLG | IYWDDDK     | CAHSRRTVAGAFAPW            | IGKV2-28         | QSLHSDGYNV  | LGS    | CMQJQLQPOTF     |
| p61.4   | p61   | IGHV3-23         | GF5FS5YA   | ITGSGDIT    | CAKVVDLMSVAIYYAMDVW        | IGKV1D-39        | QSISSY      | AAS    | CQQ5FRT5SYTF    |
| p61.6   | p61   | IGHV3-74         | GFTFRSDW   | IRDDG5TS    | CAREAPGRGNWYDLW            | IGLV3-25         | ALPNEY      | KDT    | CQ5AD55SATVVF   |
| p61.7   | p61   | IGHV1-2          | GYTFTAYF   | INAH5GGT    | CARGEFC5GGLCYFDSW          | IGKV1-5          | QRIRDY      | KAS    | CQQYDVP5ISF     |
| p61.8   | p61   | IGHV2-5          | GFSL5TYGEG | I5WDD5K     | CAHRRVIGPYPDPFDIW          | IGLV3-19         | SLRHFS      | DEN    | CM5RDPTDHIH5F   |
| p61.9   | p61   | IGHV3-23         | GFTFS5YA   | ISGSGDST    | CAKAWTYEYFDYW              | IGKV1-5          | QSISSR      | KVS    | CQQYD5Y5SF      |
| p61.10  | p61   | IGHV4-59         | GG5ISSFY   | VDYSGST     | CARDASIAPIVQD5NWFDPW       | IGKV1D-39        | QTI5RT      | AAS    | CQQ555PITF      |
| p61.11  | p61   | IGHV4-61         | GASIGSGGYI | IFHSGST     | CARRDCSSAC5FYDW            | IGLV3-21         | DIVRRS      | DDS    | CQVWDTSDHPVVF   |
| p61.12  | p61   | IGHV 3-23        | GFTFS5YA   | IDASAFGT    | CAK5AMLRGH5NDYW            | IGKV 1-16        | QGINNY      | AAS    | CQQYRSYPTVF     |
| p61.14  | p61   | IGHV4-34         | SGFFTGGF   | IDRGGTS     | CARGRRIRGFD5W              | IGKV1-17         | QGRIND      | SAS    | CLQYND5PYTF     |
| p61.15  | p61   | IGHV 1-46        | GYTFTNYF   | FNPRGGST    | CARMG5VTGPVGRWRLDPW        | IGKV 3-11        | Q5VDTY      | DAS    | CQQR5NWP5ITF    |
| p61.16  | p61   | IGHV3-7          | GFG5NF5W   | IKDDG5EK    | CMRGH55NDW                 | IGKV1-27         | QDIRH       | DAS    | CQKYN5VPWTF     |
| p61.17  | p61   | IGHV4-39         | GS5IRTHFYI | IFYSGKT     | CARHPAAEIVGW               | IGKV3-11         | Q5GVTY      | DAS    | CQQR5NWL5F5F    |
| p61.18  | p61   | IGHV1-2          | GY5FG5YI   | INP5SGDT    | CARLT5T5GNF5DRGWFDPW       | IGLV1-47         | TSNIAQYN    | KTN    | CASFD5SL5G5WVF  |
| p61.19  | p61   | IGHV1-46         | GDTFASYN   | FNP5NPLIT   | CAREETS5GWVQW              | IGLV6-57         | SGNID5NF    | EDD    | CQ5YD5GANQWVF   |
| p61.20  | p61   | IGHV 1-8         | GY5TFNFE   | MNP5NTGNT   | CAREVGS5YVWFDPW            | IGLV 3-19        | SLRSY       | GKN    | CCSRD5TSGHYWVF  |
| p61.22  | p61   | IGHV3-11         | GRF5SDYI   | ISERGHTI    | CARTEEYGTNSRRGAFD5W        | IGLV3-1          | YLGNY       | QNY    | CQAWDITQYVF     |
| p61.23  | p61   | IGHV3-15         | GFTFS5AW   | IK5KT5DGGTT | CTTGAQWLTFDYW              | IGKV1D-39        | QITITY      | AAS    | CQQYSS5PPYTF    |
| p61.24  | p61   | IGHV3-30         | GFTFTSYG   | T5PDGTYN    | CVKEAFYDGYDIW              | IGLV2-14         | SSDVGGHNY   | GVS    | CCSYT5GLYVF     |
| p61.26  | p61   | IGHV 3-33        | GFNFTRYA   | LSYDGS5K    | CARDPRLLPMFYFDW            | IGKV 3-20        | Q5T5TY      | DVS    | CQHYG55FLTF     |
| p61.27  | p61   | IGHV3-66         | GFTV5TNY   | NYSG5SI     | CARAVVQLQSHYFDYW           | IGKV3-20         | Q5VSS5Y     | GAS    | CQQY555PATF     |
| p61.28  | p61   | IGHV3-74         | GFTFSGYW   | INIDG5ST    | CVRD5N5W5YW                | IGKV2D-29        | QSLH5NSGKTY | EVS    | CMQ5IQLPLTF     |
| p61.30  | p61   | IGHV4-34         | GG5FSGDY   | IDHTG5T     | CARGGDFD5T5YHLFTW          | IGLV3-21         | DIGTKT      | DDS    | CQVWDT55AQVVF   |
| p61.31  | p61   | IGHV4-59         | SG5ISR5YH  | IYD5D5GT    | CARVTGQKFFRAGMDYW          | IGKV1D-39        | QYIMKY      | GAS    | CQQ5YSTPDTF     |
| p61.32  | p61   | IGHV4-59         | GG5ISNYI   | IYTR5T      | CATSATY5MEHW               | IGKV1-9          | HDISTY      | LAS    | CQQLR5YPLTF     |
| p61.33  | p61   | IGHV5-51         | GYTRD5YW   | IFPGD5DT    | CARRFY55GVKYFDLW           | IGLV3-21         | DVGSKA      | DDN    | CQVWDD5N5H5VF   |
| p61.34  | p61   | IGHV1-18         | GYFTSYG    | ISEYNGNT    | CARDWGVAPLVPDYW            | IGKV1-17         | QGRIND      | AAS    | CLQHTNYPLTF     |
| p61.35  | p61   | IGHV1-2          | GYTIGYI    | INPN5SGAT   | CARDPVDTAIYPHYHYGLD5W      | IGLV2-14         | SSDVGGYNY   | DVS    | CCSYG55TLVVF    |
| p61.38  | p61   | IGHV2-5          | GFSLAS5GVG | IYWDD5K     | CAHRDYD5DALQYW             | IGLV1-51         | DSNIGNNF    | DNN    | CGTWDD5SLTAGVF  |
| p61.39  | p61   | IGHV2-5          | GF5FSL5GVG | IYWDDDK     | CGHHD5GVVGH5W              | IGKV3-20         | Q5V5TY      | GAT    | CQQYD55RRLTF    |
| p61.40  | p61   | IGHV3-30         | GFTFRNYG   | LISYD55NR   | CAKDKAYYD55GWTFDYW         | IGLV3-21         | QGINNA      | DAS    | CQQ555PYTF      |
| p61.41  | p61   | IGHV3-33         | GFTFS5YA   | ISYD5GNNQ   | CAREMYD5FWSAYYAMDVW        | IGKV1-27         | HDISNY      | AAS    | CQKYN5APPLTF    |
| p61.42  | p61   | IGHV3-49         | GFTAD5YI   | IR55KTYGAAT | CSRAGDFTNFFD5W             | IGLV2-14         | SGDIG5VDY   | DVT    | CT5Y5LDTAPYIF   |
| p61.43  | p61   | IGHV3-66         | G5SVTGYI   | IY5SGTT     | CARGTYTYGYD5IW             | IGKV3-20         | Q5V55YI     | RAS    | CQQY5IS5PFTF    |
| p61.46  | p61   | IGHV4-34         | GG5FSGYI   | INQLGNT     | CARTINRVGRYFDLW            | IGKV1-12         | QGLNSW      | TTS    | CQQAN55PRTF     |

Grey: Abs isolated from patient 60; Orange: Abs isolated from patient 61

**Table S2: Kinetic interaction analysis between nAbs and glycosylated and non-glycosylated GT 3 P domains**

| bnAb   | non-glycosylated GT 3 P domain |                       |                        |
|--------|--------------------------------|-----------------------|------------------------|
|        | ka (M x s <sup>-1</sup> )      | kd (s <sup>-1</sup> ) | KD (M)                 |
| p60.1  | 6.87x10 <sup>5</sup>           | 3.3x10 <sup>-5</sup>  | 4.8x10 <sup>-11</sup>  |
| p60.12 | 8.17x10 <sup>4</sup>           | 7.43x10 <sup>-5</sup> | 9.09x10 <sup>-10</sup> |
| p60.15 | 3.12x10 <sup>5</sup>           | 5.18x10 <sup>-5</sup> | 1.66x10 <sup>-10</sup> |
| p61.15 | 3.14x10 <sup>5</sup>           | 2.56x10 <sup>-5</sup> | 8.16x10 <sup>-11</sup> |
|        | glycosylated GT 3 P domain     |                       |                        |
| p60.1  | n.d.                           | n.d.                  | n.d.                   |
| p60.12 | n.d.                           | n.d.                  | n.d.                   |
| p60.15 | 5.13x10 <sup>5</sup>           | 1.63x10 <sup>-4</sup> | 3.18x10 <sup>-10</sup> |
| p61.15 | 2.41x10 <sup>5</sup>           | 1.21x10 <sup>-4</sup> | 5.03x10 <sup>-10</sup> |

n.d.: not determined



**Table S3: Characteristics of patient samples used for ELISA and isolate neutralization in HLCs**

| Patient | Sex | Age range | HEV RNA in plasma [10 <sup>5</sup> IU/ml] | WANTAI Ag ELISA serum [OD <sub>450-630nm</sub> ] | WANTAI IgG ELISA serum [OD <sub>450-630nm</sub> ] | Samples used in this study         |
|---------|-----|-----------|-------------------------------------------|--------------------------------------------------|---------------------------------------------------|------------------------------------|
| 1       | f   | 60-69     | 6                                         | 3.61                                             | 3.36                                              | serum                              |
| 2       | f   | 30-39     | 1                                         | 3.76                                             | 2.89                                              | serum                              |
| 3       | f   | 40-49     | 9                                         | 4.03                                             | 2.62                                              | serum and stool                    |
| 4       | f   | 30-39     | 8                                         | 3.74                                             | 1.72                                              | serum                              |
| 5       | m   | 50-59     | 200                                       | 3.69                                             | 1.93                                              | serum and stool                    |
| 6       | m   | 70-79     | 6                                         | 2.53                                             | 3.58                                              | serum                              |
| 7       | m   | 50-59     | 10                                        | 3.73                                             | 3.67                                              | serum                              |
| 8       | m   | 50-59     | 3                                         | 3.97                                             | 2.19                                              | serum                              |
| 9       | f   | 30-39     | 0.9                                       | 3.64                                             | 0.43                                              | serum and stool                    |
| 10      | f   | 80-89     | 8                                         | 3.72                                             | n.t.                                              | serum                              |
| 11      | m   | 60-69     | 2                                         | >ULOQ                                            | 3.29                                              | serum                              |
| 12      | f   | 40-49     | 20                                        | 3.80                                             | 3.04                                              | serum                              |
| 13      | m   | 40-49     | 30                                        | 3.23                                             | 0.01 (negative)                                   | serum and stool                    |
| 14      | f   | 20-29     | 70                                        | 3.83                                             | 0.01 (negative)                                   | serum and stool                    |
| 60      | m   | 40-49     | n.d.                                      | n.d.                                             | 3.90                                              | peripheral blood mononuclear cells |
| 61      | m   | 70-79     | n.d.                                      | n.d.                                             | >ULOQ                                             | peripheral blood mononuclear cells |
| 378     | f   | 40-49     | n.d.                                      | n.d.                                             | 3.67                                              | serum                              |
| 380     | f   | 50-59     | n.d.                                      | n.d.                                             | 3.83                                              | serum                              |
| 381     | m   | 60-69     | n.d.                                      | n.d.                                             | 3.90                                              | serum                              |

IU=international unit; OD= optical density; >ULOQ= above upper limit of quantification

**Table S4: Kinetic interaction analysis between nAbs and non-glycosylated P domains of different strains**

|             | <b>HEV GT 1 P domain</b>       |                            |                        |
|-------------|--------------------------------|----------------------------|------------------------|
| <b>bnAb</b> | <b>ka (M x s<sup>-1</sup>)</b> | <b>kd (s<sup>-1</sup>)</b> | <b>KD (M)</b>          |
| p60.1       | 1.08x10 <sup>6</sup>           | 2.56x10 <sup>-5</sup>      | 2.38x10 <sup>-11</sup> |
| p60.12      | 9.87x10 <sup>4</sup>           | 3.25x10 <sup>-4</sup>      | 3.29x10 <sup>-9</sup>  |
| p60.15      | 1.78x10 <sup>6</sup>           | 6.79x10 <sup>-5</sup>      | 3.81x10 <sup>-11</sup> |
| p61.15      | 4.0x10 <sup>5</sup>            | 6.04x10 <sup>-4</sup>      | 1.51x10 <sup>-9</sup>  |
|             | <b>HEV GT 2 P domain</b>       |                            |                        |
| p60.1       | 6.36x10 <sup>5</sup>           | 8.16x10 <sup>-5</sup>      | 1.28x10 <sup>-10</sup> |
| p60.12      | 5.83x10 <sup>4</sup>           | 2.96x10 <sup>-5</sup>      | 5.09x10 <sup>-10</sup> |
| p60.15      | 1.32x10 <sup>6</sup>           | 2.3x10 <sup>-4</sup>       | 1.74x10 <sup>-10</sup> |
| p61.15      | 6.53x10 <sup>5</sup>           | 5.85x10 <sup>-4</sup>      | 8.96x10 <sup>-10</sup> |
|             | <b>HEV GT 4 P domain</b>       |                            |                        |
| p60.1       | 1.35x10 <sup>6</sup>           | 5.14x10 <sup>-5</sup>      | 3.82x10 <sup>-11</sup> |
| p60.12      | 6.96x10 <sup>4</sup>           | 6.09x10 <sup>-4</sup>      | 8.75x10 <sup>-9</sup>  |
| p60.15      | 8.83x10 <sup>5</sup>           | 1.04x10 <sup>-4</sup>      | 1.18x10 <sup>-10</sup> |
| p61.15      | 9.25x10 <sup>5</sup>           | 1.42x10 <sup>-4</sup>      | 1.54x10 <sup>-10</sup> |
|             | <b>rat HEV P domain</b>        |                            |                        |
| p60.1       | 9.24x10 <sup>4</sup>           | 4.56x10 <sup>-1</sup>      | 4.93x10 <sup>-6</sup>  |
| p60.12      | 4.4x10 <sup>4</sup>            | 2.46x10 <sup>-1</sup>      | 5.59x10 <sup>-6</sup>  |
| p60.15      | n.d.                           | n.d.                       | n.d.                   |
| p61.15      | n.d.                           | n.d.                       | n.d.                   |

n.d.: not determined

**Table S5: Diffraction data collection and refinement statistics**

|                                       | <b>scFv p60.1 +<br/>HEV GT3 P<br/>domain</b> | <b>Fab p60.12 +<br/>HEV GT3 P<br/>domain</b> | <b>scFv p60.15 +<br/>HEV GT3 P<br/>domain</b> | <b>scFv p61.15 +<br/>HEV GT3 P<br/>domain</b> | <b>Fab p60.12 + rat-<br/>HEV P domain</b> |
|---------------------------------------|----------------------------------------------|----------------------------------------------|-----------------------------------------------|-----------------------------------------------|-------------------------------------------|
| <b>Data collection</b>                |                                              |                                              |                                               |                                               |                                           |
| Space group                           | C 2 2 2 <sub>1</sub>                         | P 2 <sub>1</sub>                             | C 2 2 2 <sub>1</sub>                          | P 2 <sub>1</sub> 2 <sub>1</sub> 2             | P 4 <sub>3</sub> 2 <sub>1</sub> 2         |
| Resolution (Å)                        | 43.48 -1.98<br>(2.05-1.98) <sup>a</sup>      | 47.24 -2.07<br>(2.15 -2.07) <sup>a</sup>     | 48.64 - 2.41<br>(2.49 - 2.41) <sup>a</sup>    | 47.85 -1.91<br>(1.98 -1.91) <sup>a</sup>      | 48.7 -3.89<br>(4.031 -3.89) <sup>a</sup>  |
| Cell dimensions                       |                                              |                                              |                                               |                                               |                                           |
| <i>a</i> , <i>b</i> , <i>c</i> (Å)    | 75.81 159.26<br>205.67                       | 88.43 94.48 91.25                            | 56.19 122.95<br>158.67                        | 108.59 178.77<br>49.66                        | 112.86 112.86<br>184.44                   |
| $\alpha$ , $\beta$ , $\gamma$ (°)     | 90.0 90.0 90.0                               | 90.0 90.21 90.0                              | 90.0 90.0 90.0                                | 90.0 90.0 90.0                                | 90.0 90.0 90.0                            |
| PDB code                              | 8PMW                                         | 8PNO                                         | 8PMY                                          | 8PMZ                                          | 8PMX                                      |
| Complexes in AU                       | 2                                            | 2                                            | 1                                             | 1                                             | 1                                         |
| R <sub>meas</sub>                     | 0.13 (1.345)                                 | 0.129 (1.653)                                | 0.293 (2.45)                                  | 0.176 (1.50)                                  | 0.322 (4.798)                             |
| < I/ $\sigma$ (I) >                   | 12.43 (1.98)                                 | 5.3 (0.56)                                   | 7.43 (1.01)                                   | 11.23 (1.73)                                  | 7.68 (0.68)                               |
| CC <sub>1/2</sub>                     | 0.998 (0.77)                                 | 0.991 (0.193)                                | 0.993 (0.482)                                 | 0.997 (0.906)                                 | 0.998 (0.401)                             |
| Completeness (%)                      | 99.47 (94.93)                                | 84.7 (38.81)                                 | 99.61 (99.34)                                 | 97.1 (90.4)                                   | 99.18 (93.03)                             |
| Redundancy                            | 13.23 (21.4)                                 | 3.27 (3.8)                                   | 13.12 (19.16)                                 | 13.52 (25.2)                                  | 25.91 (42.45)                             |
|                                       |                                              |                                              |                                               |                                               |                                           |
| <b>Refinement</b>                     |                                              |                                              |                                               |                                               |                                           |
| No. reflections                       | 86310 (8192)                                 | 77316 (3527)                                 | 21738 (2116)                                  | 72647 (5777)                                  | 11444                                     |
| R <sub>work</sub> / R <sub>free</sub> | 0.191 / 0.211                                | 0.214 / 0.244                                | 0.1993 / 0.238                                | 0.2065 / 0.2395                               | 0.2806 / 0.3537                           |
| No. atoms                             |                                              |                                              |                                               |                                               |                                           |
| Protein                               | 1069                                         | 1461                                         | 2888                                          | 5804                                          | 5572                                      |
| ligands                               | 26                                           | 0                                            | 3                                             | 38                                            | 0                                         |
| solvent                               | 308                                          | 184                                          | 107                                           | 321                                           | 0                                         |
|                                       |                                              |                                              |                                               |                                               |                                           |

|                                |       |       |       |       |        |
|--------------------------------|-------|-------|-------|-------|--------|
| B-factor                       |       |       |       |       |        |
| Protein                        | 45.92 | 49.31 | 58.05 | 36.31 | 188.35 |
| ligands                        | 60.38 |       | 87.37 | 51.79 |        |
| solvent                        | 46.30 | 35.24 | 60.94 | 33.55 |        |
| R.m.s deviations               |       |       |       |       |        |
| Bond lengths (Å)               | 0.011 | 0.011 | 0.011 | 0.011 | 0.010  |
| Bond angles (°)                | 1.57  | 1.61  | 1.63  | 1.60  | 1.45   |
| Ramachandran plot <sup>§</sup> |       |       |       |       |        |
| Favored (%)                    | 96.58 | 96.04 | 96.48 | 97.18 | 84.09  |
| Allowed (%)                    | 3.23  | 3.75  | 3.52  | 2.82  | 15.08  |
| Outliers (%)                   | 0.19  | 0.21  | 0.00  | 0.00  | 0.83   |
| Rotamer outliers (%)           | 0.67  | 1.72  | 1.28  | 0.00  | 10.02  |
| Clashscore                     | 0.93  | 2.63  | 2.1   | 1.47  | 10.74  |

A single crystal was used to collect each of the individual diffraction data sets

<sup>a</sup> Values in parentheses are for highest-resolution shell.

<sup>§</sup> Ramachandran statistics were calculated with MolProbity

**Table S6: Accession numbers of virus strains and isolates used in this study**

| <b>Synthetic gene</b> | <b>Origin</b>                | <b>UniprotKB/ Genbank</b> |
|-----------------------|------------------------------|---------------------------|
| HEV ORF2_GT1          | isolate/human/Pakistan/Sar55 | P33426                    |
| HEV ORF2_GT2          | isolate/human/Mexico         | Q03500                    |
| HEV ORF2_GT3          | isolate/human/Japan          | C4B4T9                    |
| HEV ORF2_GT4          | isolate/human/China          | Q9IVZ8                    |
| HEV ORF2_rat          | R68/DEU/2009                 | E0XL23                    |
| G3-HEV 83-2-27        | Shiota et al., 2013, J Virol | AB740232                  |
| Kernow_C1_p6 wt       | Isolate/human/United Kingdom | JQ679013                  |

**Table S7: HEV antigen detection by different ELISAs**

**Patient 1, female, aged 60-69:**

| <b>timepoint</b> | <b>HEV RNA<br/>(IU/ml)</b> | <b>non-glycosylated<br/>pORF2 (p60.1, S/CO)</b> | <b>all pORF2 (p60.15, S/CO)</b> | <b>WANTAI HEV Ag (S/CO)</b> |
|------------------|----------------------------|-------------------------------------------------|---------------------------------|-----------------------------|
| pre-treatment    | 600000                     | 28,62                                           | 30,60                           | 16,45                       |
| treatment (TW16) | n. d.                      | 0,75                                            | 36,76                           | 19,05                       |
| 12 months FU     | n. d.                      | 0,34                                            | 7,69                            | 19,97                       |

**Patient 2, male, aged 20-29:**

| <b>timepoint</b> | <b>HEV RNA<br/>(IU/ml)</b> | <b>non-glycosylated<br/>pORF2 (p60.1, S/CO)</b> | <b>all pORF2 (p60.15, S/CO)</b> | <b>WANTAI HEV Ag (S/CO)</b> |
|------------------|----------------------------|-------------------------------------------------|---------------------------------|-----------------------------|
| pre-treatment    | 3000000                    | 34,77                                           | 29,06                           | 13,60                       |
| treatment (TW4)  | n. d.                      | 0,88                                            | 15,26                           | 13,93                       |
| 12 months FU     | n. d.                      | 0,32                                            | 0,57                            | 0,20                        |

Red: HEV detection positive; Green: HEV detection negative; n.d.: not detected; Source data are provided within the Source Data file.

**Table S8: List of oligonucleotides used for cloning**

| <b>P domain construct</b>         | <b>Forward primer</b>                           | <b>Reverse primer</b>                           |
|-----------------------------------|-------------------------------------------------|-------------------------------------------------|
| GT 3 P domain mNeon               | CGCTGAAAACCTGTATTTTCAGGGCCCCGCCCCAAGCCGGCCC     | GGGTTTAAACTCAGGGCCCTCACGATTCTCGCGTTTACCC        |
| GT 3 P domain mRuby               | GAGCTGTACAAGGACGATGACGATAAGCCCGCCCCAAGCCGGCCC   | GGGTTTAAACTCAGGGCCCTCACGATTCTCGCGTTTACCC        |
| GT 3 P domain non-glycosylated    | TTTTCAGGGCGACGATGACGATAAGCCCGCCCCAAGCCGGCCC     | GGGTTTAAACTCAGGGCCCTCACGATTCTCGCGTTTACCC        |
| GT 3 P domain glycosylated        | TTTTCAGGGCGACGATGACGATAAGCCCGCCCCAAGCCGGCCC     | GGGTTTAAACTCAGGGCCCTCACGATTCTCGCGTTTACCC        |
| GT 1 P domain non-glycosylated    | TTTTCAGGGCGACGATGACGATAAGCCAGCCCCATCGCGTCCT     | GGGTTTAAACTCAGGGCCCTCATAACTCCCGAGTTTACCCAC      |
| GT 2 P domain non-glycosylated    | TTTTCAGGGCGACGATGACGATAAGCCAGCCCCCAGCAGGCCA     | GGGTTTAAACTCAGGGCCCTCAGAGCTCGCGGGTTTACC         |
| GT 4 P domain non-glycosylated    | TTTTCAGGGCGACGATGACGATAAGCCCGCCCCCAGTCGCCCCG    | GGGTTTAAACTCAGGGCCCTCAGTATTCACGTGTCTTGCCCA      |
| rat HEV P domain non-glycosylated | TTTTCAGGGCGACGATGACGATAAGCCCGCACCTGCCCCACCT     | GGGTTTAAACTCAGGGCCCTCATACGCTATCGGCTGCGGC        |
|                                   |                                                 |                                                 |
| <b>IgG construct</b>              | <b>Forward primer</b>                           | <b>Reverse primer</b>                           |
| p60.1-HC                          | GCTGGTCGCTTCCTGCCTGGGCGAAGTTCAGCTGCAGCAGA       | CCGATGGGCCCTTCGTA CTGGCCGA ACTAACAGTGACCAACG    |
| p60.1-KC                          | GCTGGTCGCTTCCTGCCTGGGCATT CAGATGACACAAAGCCCT    | CGGATGGGGCGGCCACGGTGCGCTTCAAATCGACTTTTGTTC      |
| p60.4-HC                          | GCTGGTCGCTTCCTGCCTGGGCCAGGTACAGCTGGTACAAAGC     | CCGATGGGCCCTTCGTA CTGGCACTCGATAACCGTTACTGTAGTTC |
| p60.4-KC                          | GCTGGTCGCTTCCTGCCTGGGCGATATACAAATGACACAGAGCCCCG | CGGATGGGGCGGCCACGGTGCGTTTTATCTCCACCTTAGTACCTCCT |

|           |                                                 |                                                 |
|-----------|-------------------------------------------------|-------------------------------------------------|
| p60.5-HC  | GCTGGTCGCTTCCTGCCTGGGCGAAGTTCAACTCGTGGAAGTG     | CCGATGGGCCCTTCGTA CTGGCACTACTACCGTCACTGTAGT     |
| p60.5-KC  | GCTGGTCGCTTCCTGCCTGGGCGATATTGTGATGACTCAGAGCCC   | CGGATGGGGCGGCCACGGTGCGTTTAATTTTCGAGCTTGGTGCC    |
| p60.6-HC  | GCTGGTCGCTTCCTGCCTGGGCGAGGTTCAACTGCTGGAAGT      | CCGATGGGCCCTTCGTA CTGGCGCTGGATACCGTTACCAAAGT    |
| p60.6-LC  | GCTGGTCGCTTCCTGCCTGGGCCAGTCCGCATTGACTCAAC       | ATGGGGCGGCCCTTCGGCTGGCCCAGGACTGTGAGTTTGGTG C    |
| p60.10-HC | GCTGGTCGCTTCCTGCCTGGGCCAGGTGCAACTCCAGCAA        | CCGATGGGCCCTTCGTA CTGGCCGACGATACAGTTACCAAAGTG   |
| p60.10-LC | GCTGGTCGCTTCCTGCCTGGGCCAAAGTGCTTTGACGCAACC      | ATGGGGCGGCCCTTCGGCTGGCCCAGGACTGTCACCTTCGT       |
| p60.12-HC | GCTGGTCGCTTCCTGCCTGGGCCAGGTACAGTTGGTTCAAAGTG    | CCGATGGGCCCTTCGTA CTGGCGCTGCTGACCGTCACCAA       |
| p60.12-LC | GCTGGTCGCTTCCTGCCTGGGCCAGAGTGCTCTCACTCAACC      | ATGGGGCGGCCCTTCGGCTGGCCGAGAACAGTGAGCTTGGTG C    |
| p60.13-HC | GCTGGTCGCTTCCTGCCTGGGCGAAGTGACAGCTCGTTGAGT      | CCGATGGGCCCTTCGTA CTGGCCGAGGAGACTGTTACGAGAG     |
| p60.13-LC | GCTGGTCGCTTCCTGCCTGGGCCAATCCGTTTTGACTCAACCC     | ATGGGGCGGCCCTTCGGCTGGCCGAGAACAGTGAGCTTAGTTCCA   |
| p60.15-HC | GCTGGTCGCTTCCTGCCTGGGCGAAGTCCAACCTCGTGCAATC     | CCGATGGGCCCTTCGTA CTGGCCGAGCTAACAGTAACCAATGTTC  |
| p60.15-KC | GCTGGTCGCTTCCTGCCTGGGCGCGATACAATTGACACAGAGTC    | CGGATGGGGCGGCCACGGTGCGTTTGATATCGACCTTTGTTCCAGG  |
| p60.17-HC | GCTGGTCGCTTCCTGCCTGGGCCAAGTCCAACCTCGTTCAGTCC    | CCGATGGGCCCTTCGTA CTGGCCGA ACTAACCGTTACGAGCG    |
| p60.17-LC | GCTGGTCGCTTCCTGCCTGGGCCAGTCGGCACTCACTCAA        | ATGGGGCGGCCCTTCGGCTGGCCCAAGACGGTCAATTTCGTTCC    |
| p60.26-HC | GCTGGTCGCTTCCTGCCTGGGCCAAGTGCAATTGGTGCAATCG     | CCGATGGGCCCTTCGTA CTGGCGCTCGACACGGTTACGGT       |
| p60.26-LC | GCTGGTCGCTTCCTGCCTGGGCTCCTATGAACTGACTCAACCAC    | ATGGGGCGGCCCTTCGGCTGGCCCAGAACTGTCAGCTTGGTG C    |
| p60.34-HC | GCTGGTCGCTTCCTGCCTGGGCCAAGTGCAATTGGTGCAAGT      | CCGATGGGCCCTTCGTA CTGGCGCTGCTTACCGTTACCAGC      |
| p60.34-LC | GCTGGTCGCTTCCTGCCTGGGCCAGCTGGTTCTCACGCAA        | ATGGGGCGGCCCTTCGGCTGGCCCAAGACGGTCAGTTTGTGC      |
| p60.35-HC | GCTGGTCGCTTCCTGCCTGGGCCAAGTACATTGGTGCAAGTCG     | CCGATGGGCCCTTCGTA CTGGCGGAGGATATGGTCACGAGGG     |
| p60.35-LC | GCTGGTCGCTTCCTGCCTGGGCAATTTTATGTTGACACAGCCTCATA | ATGGGGCGGCCCTTCGGCTGGCCCAGTACCGTGAGTTTGTGC      |
| p60.36-HC | GCTGGTCGCTTCCTGCCTGGGCCAGGTGCAGTTGGTTCAAAG      | CCGATGGGCCCTTCGTA CTGGCCGAGCTCACGGTTACCAA       |
| p60.36-LC | GCTGGTCGCTTCCTGCCTGGGCAGCTATGAATTGACTCAACCACC   | ATGGGGCGGCCCTTCGGCTGGCCCAGGACCGTCAGCTTGGT       |
| p60.45-HC | GCTGGTCGCTTCCTGCCTGGGCCAAGTACAGCTCGTGCAAGT      | CCGATGGGCCCTTCGTA CTGGCGCTGCTTACCGTAACCAATG     |
| p60.45-LC | GCTGGTCGCTTCCTGCCTGGGCAGCTACGTTCTGACACAACC      | ATGGGGCGGCCCTTCGGCTGGCCCAGTGCTGTGAGTTTAGTGCC    |
| p61.15-HC | GCTGGTCGCTTCCTGCCTGGGCCAAGTGCAACTCGTGCAAT       | CCGATGGGCCCTTCGTA CTGGCACTACTCACGGTAACGAGAGT    |
| p61.15-KC | GCTGGTCGCTTCCTGCCTGGGCGAAATAGTTCTCACACAGTCCCC   | CGGATGGGGCGGCCACGGTGCGTTTTTATTTTCGAGCCTTGTTCTTG |
| 8G12-HC   | GCTGGTCGCTTCCTGCCTGGGCGGACAGCTGCAGCAGAGT        | CCGATGGGCCCTTCGTA CTGGCACTCGATACTGTAACCAACGTG   |
| 8G12-KC   | GCTGGTCGCTTCCTGCCTGGGCGACATACAAATGACTCAGAGTCCT  | CGGATGGGGCGGCCACGGTGCGCTTGATTTC AATTTGTACCGCT   |



**Source Data for Fig. S1: HEV antigen detection by different ELISAs**

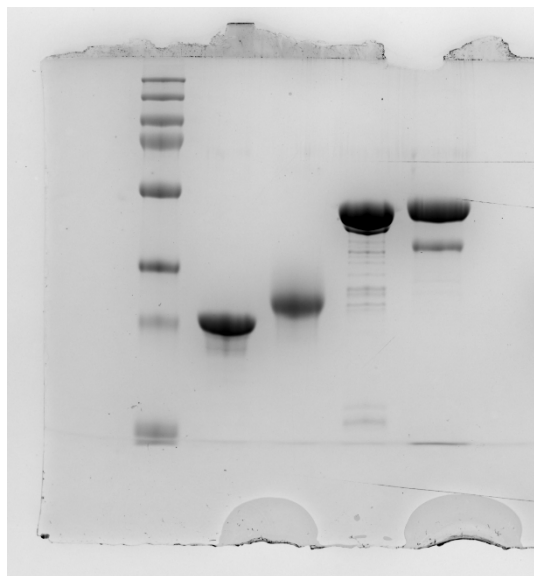

Supplement: MOESM1 [file 41467_2025_57182_MOESM1_ESM.pdf]
